# Supplementary material
Source: publisher figshare collection journal article supplement (https://acs.figshare.com/ndownloader/files/5746257)
Supplement: Supplementary file 1 [file 5746257]

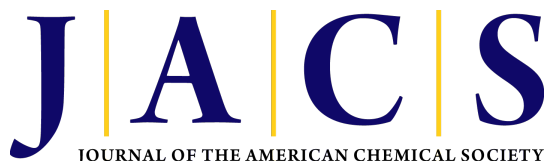

J | A | C | S  
JOURNAL OF THE AMERICAN CHEMICAL SOCIETY

J. Am. Chem. Soc., 1996, 118(13), 3192-3201, DOI:[10.1021/ja952014o](https://doi.org/10.1021/ja952014o)

#### Terms & Conditions

Electronic Supporting Information files are available without a subscription to ACS Web Editions. The American Chemical Society holds a copyright ownership interest in any copyrightable Supporting Information. Files available from the ACS website may be downloaded for personal use only. Users are not otherwise permitted to reproduce, republish, redistribute, or sell any Supporting Information from the ACS website, either in whole or in part, in either machine-readable form or any other form without permission from the American Chemical Society. For permission to reproduce, republish and redistribute this material, requesters must process their own requests via the RightsLink permission system. Information about how to use the RightsLink permission system can be found at <http://pubs.acs.org/page/copyright/permissions.html>

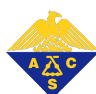

ACS Publications

MOST TRUSTED. MOST CITED. MOST READ.

Copyright © 1996 American Chemical Society

J3201-1

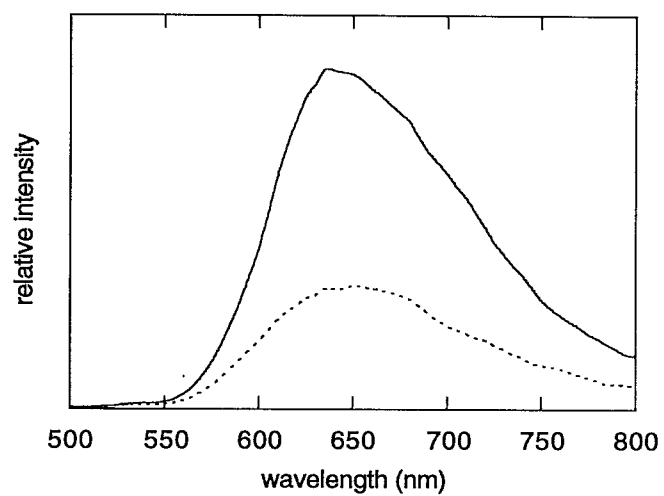

**Supplementary Material Figure 1.** Emission spectra at the beginning (-----) and end (——) of the titration of Ru(dmbpy)<sub>3</sub><sup>2+</sup> with AC1106 shown in Figure 3b

J3201-2

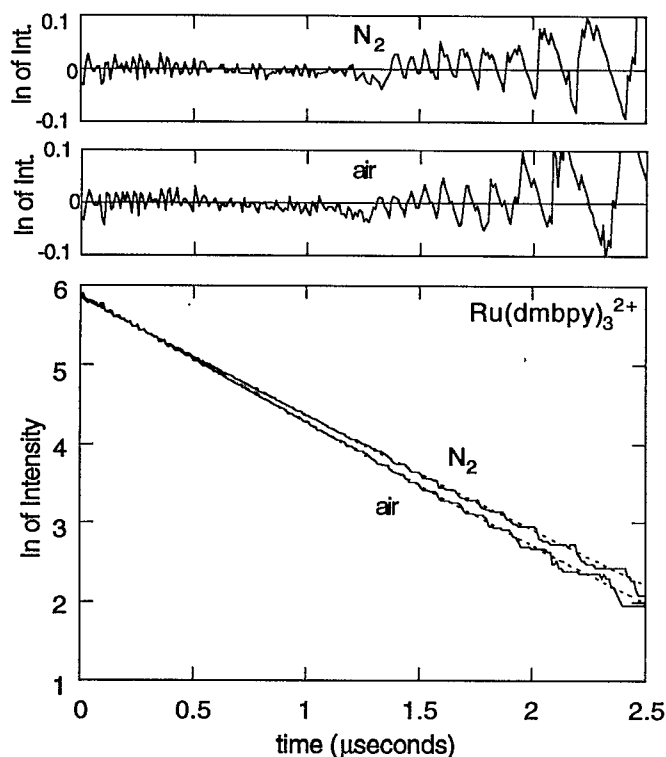

**Supplementary Material Figure 2.** Semilogarithmic plot of the luminescence decay trace of  $\text{Ru(dmbpy)}_3^{2+}$  ( $1.3 \times 10^{-5} \text{ M}$ ) in the presence of AC1106 ( $2.0 \times 10^{-5} \text{ M}$  in Ab binding sites) in  $\text{N}_2$  and air-saturated PBS. As determined by the residuals shown above each plot, the luminescence decay traces of these species gave a satisfactory fit (----) to a single-exponential decay process assigned to the fully bound metal complex. Excited state lifetimes for these species are given in Table 1.

J3201-3

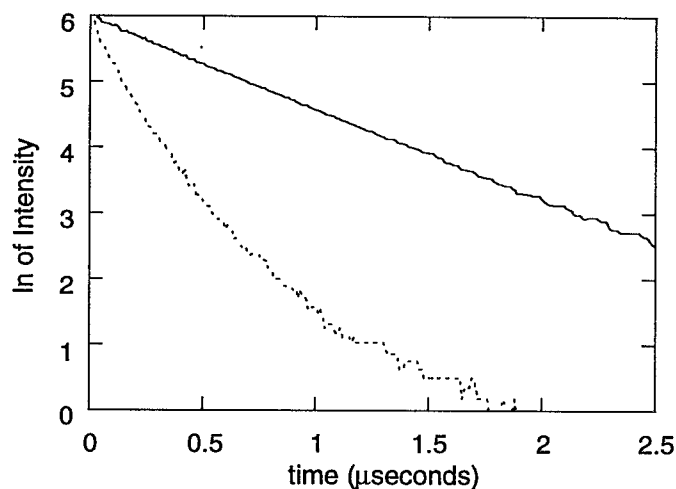

**Supplementary Material Figure 3.** Semilogarithmic plot of the luminescence decay trace of the AC1106-bound  $\text{Ru(dmbpy)(bpy)}_2^{2+}$  ( $1.4 \times 10^{-5} \text{ M}$ ) in the absence (—) and presence (----) of methyl viologen ( $3.4 \times 10^{-3} \text{ M}$ ) in air-saturated PBS. The upper linear trace corresponds to the single-exponential luminescence decay process before the addition of methyl viologen and is assigned, as in Figure 5, to the antibody-bound  $\text{Ru(dmbpy)(bpy)}_2^{2+}$ . The curved nature of the lower plot, seen in the presence of high concentrations of methyl viologen, clearly indicates the presence of more than one component.
